# Supplementary material for: Protein-directed synthesis of Bi2S3 nanoparticles as an efficient contrast agent for visualizing the gastrointestinal tract
Source: Royal Society of Chemistry journal article supplement (doi:10.1039/c7ra01526g), 2017-01-01
Supplement: c7ra01526g1.pdf [file c7ra01526g1.pdf]

## **Supporting Information**

### **Protein-directed synthesis of Bi<sub>2</sub>S<sub>3</sub> nanoparticles as an efficient contrast agent for visualizing gastrointestinal tract**

Yan Zu, Yuan Yong, Xiao Zhang, Jie Yu, Xinghua Dong, Wenyan Yin,  
Liang Yan\*, Feng Zhao, Zhanjun Gu, Yuliang Zhao

CAS Key Laboratory for Biomedical Effects of Nanomaterials and Nanosafety,  
Institute of High Energy Physics, and National Center for Nanoscience Technology of  
China, Chinese Academy of Sciences, Beijing 100049, People's Republic of China

\*Corresponding author:

E-mail: [yanliang@ihep.ac.cn](mailto:yanliang@ihep.ac.cn) (L. Yan)

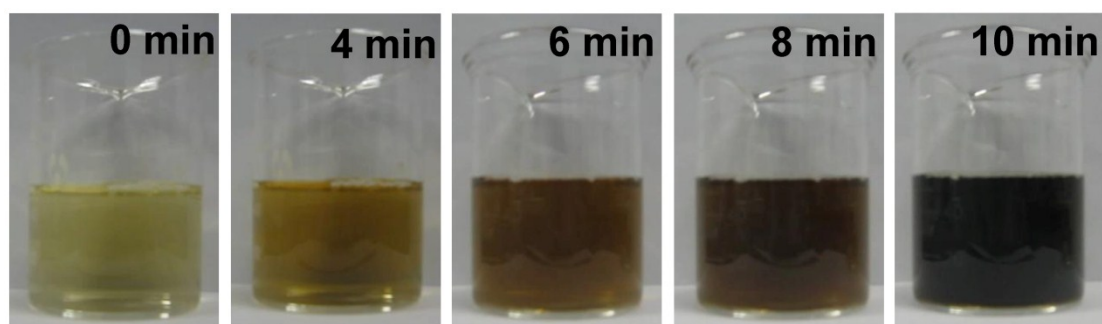

**Fig. S1** Color changes of the reaction solution during the formation process of BSA@Bi<sub>2</sub>S<sub>3</sub> NPs.

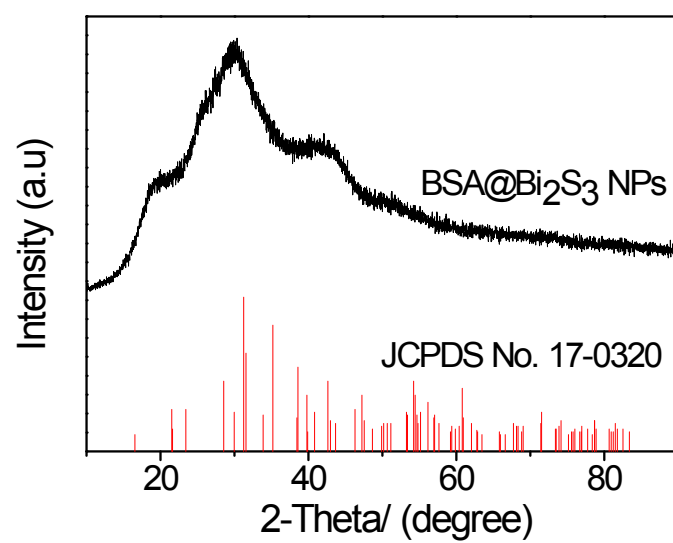

**Fig. S2** XRD pattern of BSA@Bi<sub>2</sub>S<sub>3</sub> NPs.

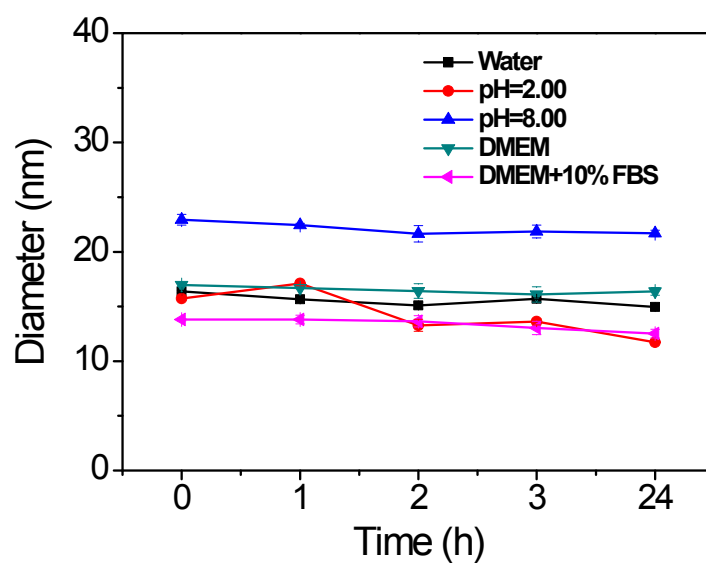

**Fig. S3** Hydrodynamic diameters of BSA@Bi<sub>2</sub>S<sub>3</sub> NPs after dissolving in water, buffer solutions (pH 2.00 and 8.00), DMEM and DMEM containing 10% FBS at different time points (0, 1, 2, 3 and 24 h).

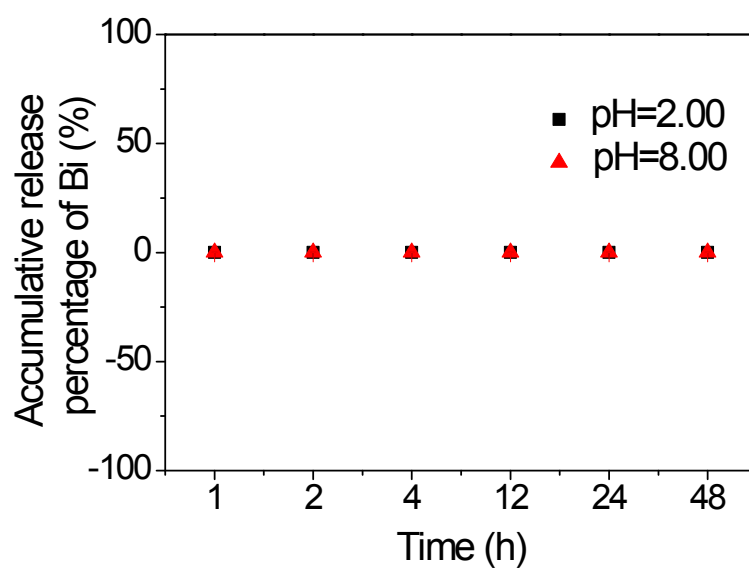

**Fig. S4** Accumulative release profiles of BSA@Bi<sub>2</sub>S<sub>3</sub> NPs at pH 2.00 and 8.00 buffer solutions during 48 h, showing no obvious released Bi<sup>3+</sup> in the above two pH solutions, and demonstrating the desired chemical stability of BSA@Bi<sub>2</sub>S<sub>3</sub> NPs.

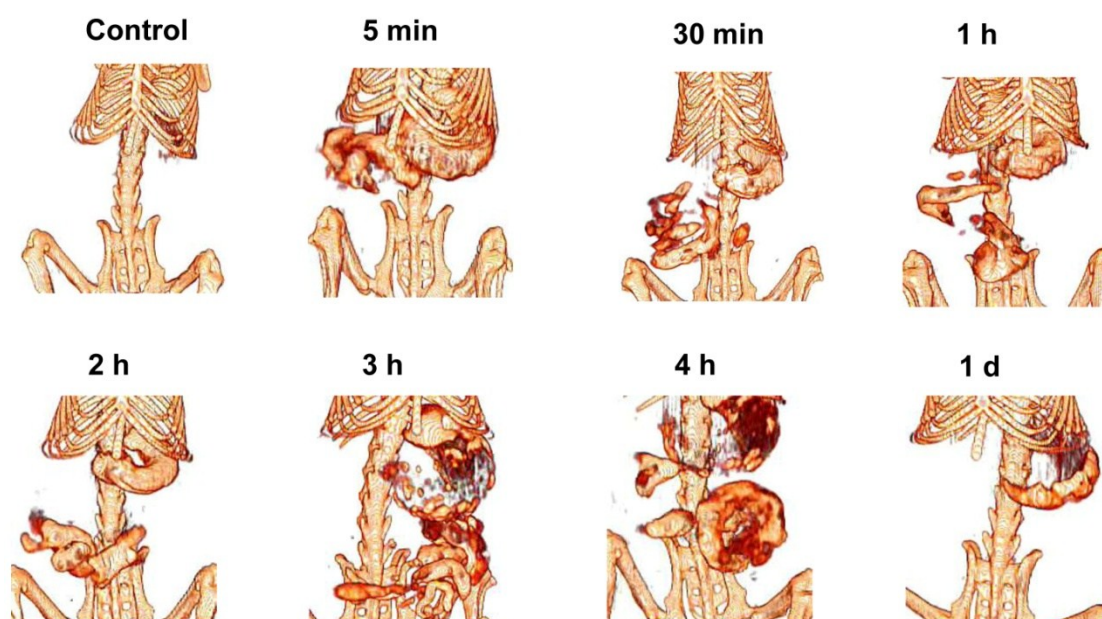

**Fig. S5** CT imaging of mouse GI tract by using BaSO<sub>4</sub> as contrast agents with the concentration of 20 mg/mL.

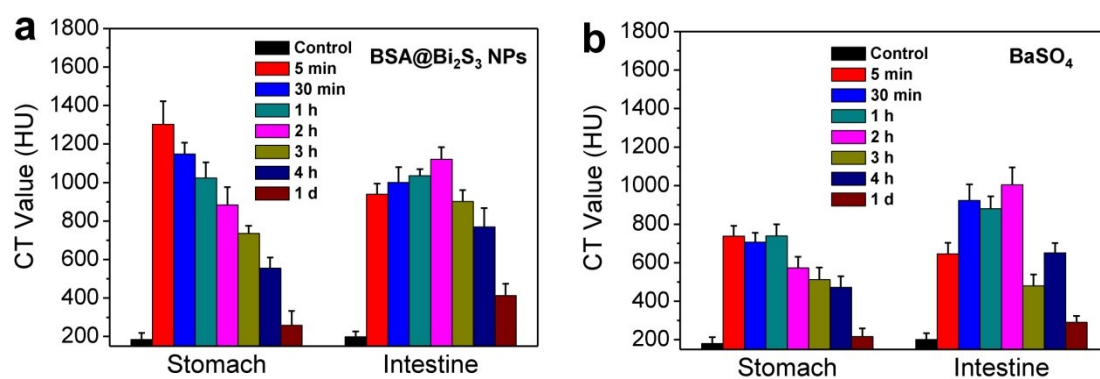

**Fig. S6** The CT values (HU) of the stomach and intestine of mice after oral administration of BSA@Bi<sub>2</sub>S<sub>3</sub> NPs (20 mg/mL) (a) and BaSO<sub>4</sub> (b) at different time points.

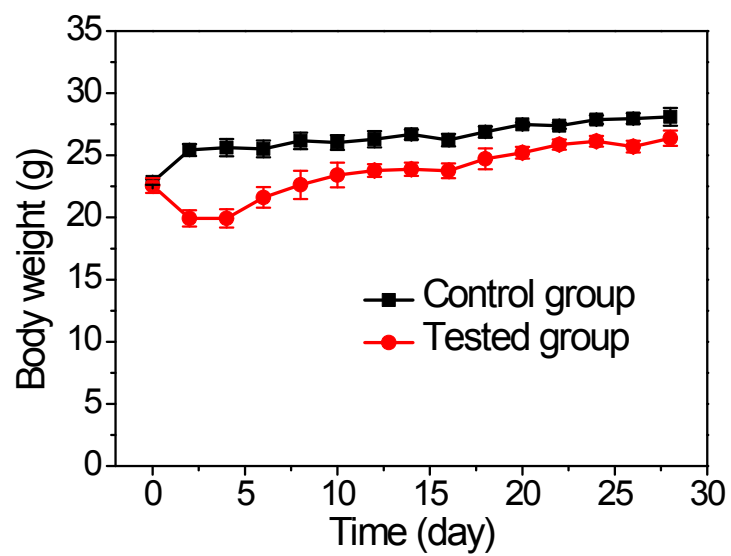

**Fig. S7** Body weight changes in the control and tested mice, respectively.

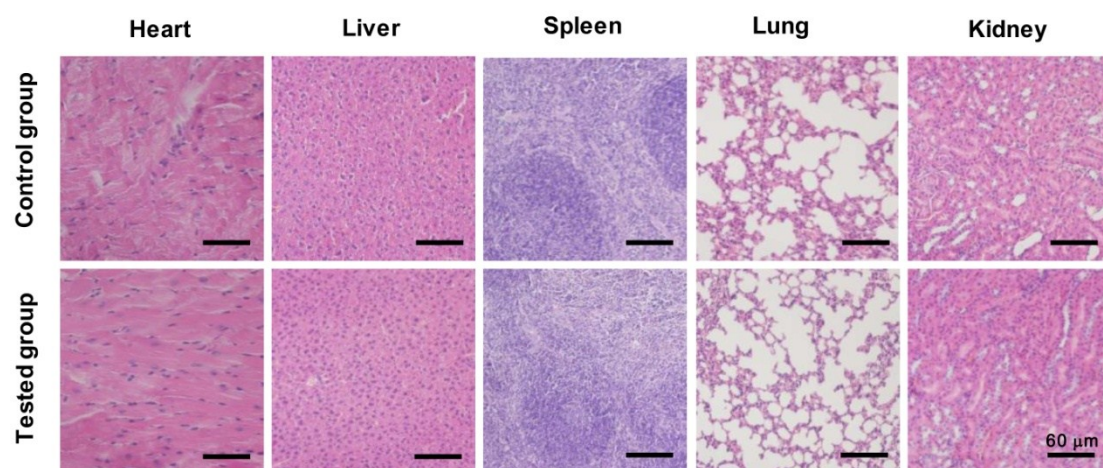

**Fig. S8** H&E stained images of main organs collected from mice 28 days after orally administration of BSA@Bi<sub>2</sub>S<sub>3</sub> NPs with the concentration of 20 mg/mL.

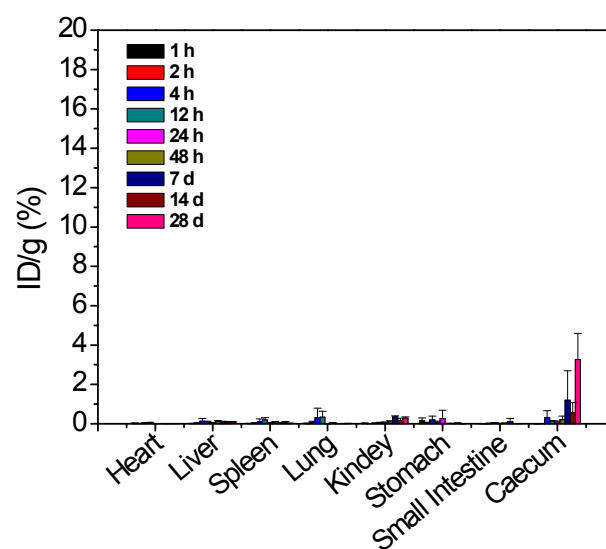

**Fig. S9** Biodistribution of bismuth element from BSA@Bi<sub>2</sub>S<sub>3</sub> NPs at various tissues of the mice at different intervals after oral administration.
